# Supplementary material for: Effect of inotropic agents on oxygenation and cerebral perfusion in acute brain injury
Source: PubMed Central journal article supplement (PMC9343780; doi:10.3389/fneur.2022.963562), 2022-07-19
Supplement: Data_Sheet_1.pdf [file Data_Sheet_1.pdf]

## *Supplementary Material*

**Supplemental Table S1:** Characteristics of the study population. Data are presented as count (%) or median (IQRs).

| <b>Variables</b>                              | <b>All patients<br/>(N=35)</b> |
|-----------------------------------------------|--------------------------------|
| Age, years - median (IQR)                     | 55 (46-62)                     |
| Male gender, n (%)                            | 18 (51)                        |
| APACHE score on admission – median (IQR)      | 19 (12-23)                     |
| Glasgow Coma Scale on admission- median (IQR) | 9 (3-13)                       |
| SOFA score at ICU admission - median (IQR)    | 9 (4-10)                       |
| Underlying disease, n (%)                     |                                |
| <i>Non-traumatic SAH</i>                      | 31 (89)                        |
| <i>TBI</i>                                    | 2 (6)                          |
| <i>ICH</i>                                    | 2 (6)                          |
| <b>COMORBIDITIES</b>                          |                                |
| Alcohol abuse, n (%)                          | 7 (20)                         |
| Smoking, n (%)                                | 8 (23)                         |
| Drug abuse, n (%)                             | 1 (3)                          |
| Arterial Hypertension, n (%)                  | 14 (40)                        |
| Chronic Heart Disease (NYHA 3 or 4), n (%)    | 3 (9)                          |
| Diabetes mellitus, n (%)                      | 3 (9)                          |
| COPD, n (%)                                   | 2 (6)                          |
| Liver Cirrhosis, n (%)                        | 1 (3)                          |
| Cancer, n (%)                                 | 0                              |
| Previous neurological disease, n (%)          | 2 (6)                          |
| <b>DURING ICU STAY</b>                        |                                |
| Mechanical ventilation, n (%)                 | 34 (97)                        |
| Days on mechanical ventilation, median (IQR)  | 10 (5-19)                      |
| Vasopressors, n (%)                           | 34 (97)                        |
| RRT, n (%)                                    | 1 (3)                          |
| Sedation, n (%)                               | 34 (97)                        |
| Opioid administration, n (%)                  | 34 (97)                        |
| Anti-epileptics prophylaxis n (%)             | 34 (97)                        |
| <b>NEUROLOGICAL COMPLICATIONS</b>             |                                |
| Intracranial hypertension, n (%)              | 21 (60)                        |
| Seizures, n (%)                               | 7 (20)                         |

|                                                     |            |
|-----------------------------------------------------|------------|
| Rebleeding, n (%)                                   | 3 (9)      |
| Hydrocephalus, n (%)                                | 17 (49)    |
| Delayed cerebral ischemia, n (%)                    | 19 (54)    |
| At least one episode of brain tissue hypoxia, n (%) | 32 (91)    |
| <b>OUTCOMES</b>                                     |            |
| ICU LOS, days – median (IQR)                        | 19 (13-26) |
| Hospital LOS, days – median (IQR)                   | 26 (14-44) |
| ICU death, (%)                                      | 20 (57)    |
| Hospital death, n (%)                               | 20 (57)    |
| GOS at 6 months – median (IQR)                      | 1 (1-4)    |
| Unfavorable neurological outcome at 6 months, n (%) | 25 (71)    |

*IQR: interquartile range; GCS: Glasgow coma scale; SAPS: simplified acute physiology score; NYHA: New York heart association COPD: chronic obstructive pulmonary disease; RRT: renal replacement therapy; ICU: intensive care unit; LOS: length of stay; GOS: Glasgow outcome score; SAH: subarachnoid hemorrhage; TBI: traumatic brain injury; ICH: intracerebral hemorrhage.*

**Supplemental Table S2:** Comparison between responder and non-responder groups.

| Variables                                           | Non-Responders  | Responders     | p-value |
|-----------------------------------------------------|-----------------|----------------|---------|
|                                                     | (N=23)          | (N=12)         |         |
| Age, years - median (IQR)                           | 55 (46-61)      | 56 (48-64)     | 0.48    |
| Male gender, n (%)                                  | 12 (52)         | 6 (50)         | 0.54    |
| APACHE score on admission – median (IQR)            | 19 (12-23)      | 20 (15-22)     | 0.85    |
| Glasgow Coma Scale on admission- median (IQR)       | 5 (3-11)        | 5 (3-14)       | 0.72    |
| SOFA score at ICU admission - median (IQR)          | 9 (5-10)        | 7 (5-9)        | 0.12    |
| Underlying disease, n (%)                           |                 |                | 0.69    |
| <i>Non-traumatic SAH</i>                            | 20 (87)         | 11 (92)        |         |
| <i>TBI</i>                                          | 2 (9)           | 0              |         |
| <i>ICH</i>                                          | 1 (5)           | 1 (5)          |         |
| mFisher 3/4                                         | 19/20 (95)      | 10/11 (91)     | 0.99    |
| WFNS 4/5                                            | 16/20 (80)      | 7/11 (64)      | 0.41    |
| <b>COMORBIDITIES</b>                                |                 |                |         |
| Alcohol abuse, n (%)                                | 6 (26)          | 1 (8)          | 0.38    |
| Smoking, n (%)                                      | 6 (26)          | 2 (17)         | 0.69    |
| Drug abuse, n (%)                                   | 0 (0)           | 1 (8)          | 0.34    |
| Arterial Hypertension, n (%)                        | 12 (52)         | 2 (17)         | 0.07    |
| Chronic Heart Disease (NYHA 3 or 4), n (%)          | 3 (13)          | 0              | 0.54    |
| Diabetes mellitus, n (%)                            | 3 (13)          | 0              | 0.54    |
| COPD, n (%)                                         | 1 (4)           | 1 (8)          | 0.99    |
| Liver Cirrhosis, n (%)                              | 0               | 1 (8)          | 0.34    |
| Cancer, n (%)                                       | 0               | 0              | -       |
| Previous neurological disease, n (%)                | 1 (4)           | 1 (8)          | 0.99    |
| <b>DURING ICU STAY</b>                              |                 |                |         |
| Mechanical ventilation, n (%)                       | 23 (100)        | 11 (92)        | 0.34    |
| Vasopressors, n (%)                                 | 23 (100)        | 11 (92)        | 0.34    |
| RRT, n (%)                                          | 1 (4)           | 0              | 0.99    |
| Sedation, n (%)                                     | 22 (96)         | 11 (92)        | 0.99    |
| Opioid administration, n (%)                        | 23 (100)        | 11 (92)        | 0.34    |
| Anti-epileptics prophylaxis n (%)                   | 15 (65)         | 10 (83)        | 0.43    |
| <b>NEUROLOGIC COMPLICATIONS</b>                     |                 |                |         |
| Seizures, n (%)                                     | 2 (9)           | 5 (42)         | 0.03    |
| Rebleeding, n (%)                                   | 0               | 3 (25)         | 0.03    |
| Hydrocephalus, n (%)                                | 12 (52)         | 5 (42)         | 0.73    |
| DCI, n (%)                                          | 13 (57)         | 6 (50)         | 0.74    |
| Intracranial hypertension, n (%)                    | 12 (52)         | 9 (75)         | 0.28    |
| At least one episode of brain tissue hypoxia, n (%) | 22 (96)         | 10 (83)        | 0.27    |
| <b>BASELINE VARIABLES</b>                           |                 |                |         |
| PbtO <sub>2</sub> , mmHg                            | 22 (19-28)      | 12 (8-16)      | 0.001   |
| Hb, g/dL                                            | 11.5 (9.1-12.6) | 10.9 (10-12.2) | 0.69    |

|                                                      |                  |                  |      |
|------------------------------------------------------|------------------|------------------|------|
| MAP, mmHg                                            | 122 (117-132)    | 109 (88-120)     | 0.07 |
| CPP, mmHg                                            | 115 (104-118)    | 94 (72-104)      | 0.03 |
| ICP, mmHg                                            | 12 (6-14)        | 15 (13-20)       | 0.01 |
| HR, bpm                                              | 85 (76-100)      | 94 (77-108)      | 0.50 |
| Temperature, °C                                      | 37.0 (36.0-37.4) | 36.7 (35.6-37.7) | 0.88 |
| pH                                                   | 7.41 (7.37-7.46) | 7.41 (7.36-7.43) | 0.48 |
| PaO <sub>2</sub> , mmHg                              | 109 (95-130)     | 112 (90-205)     | 0.67 |
| PaCO <sub>2</sub> , mmHg                             | 44 (41-48)       | 39 (35-44)       | 0.06 |
| Lactate, mmol/L                                      | 1.1 (0.8-1.4)    | 1.1 (0.9-1.2)    | 0.88 |
| SaO <sub>2</sub> , %                                 | 99 (98-99)       | 99 (97-100)      | 0.55 |
| Glucose, mg/dL                                       | 135 (125-175)    | 130 (117-155)    | 0.77 |
| SvO <sub>2</sub> , %*                                | 80 (79-82)       | 78 (73-83)       | 0.76 |
| CO, L/min*                                           | 6.1 (5.1-8.2)    | 5.9 (3.5-7.4)    | 0.72 |
| Norepinephrine, mcg/kg/min                           | 0.43 (0.17-1.2)  | 0.35 (0.1-1.8)   | 0.80 |
| <b>OUTCOMES</b>                                      |                  |                  |      |
| ICU LOS, days – median (IQR)                         | 21 (16-28)       | 13 (8-18)        | 0.02 |
| Hospital LOS, days – median (IQR)                    | 31 (17-44)       | 14 (8-27)        | 0.09 |
| ICU death, (%)                                       | 11 (49)          | 9 (75)           | 0.16 |
| Hospital death, n (%)                                | 11 (49)          | 9 (75)           | 0.16 |
| GOS at 6 months – median (IQR)                       | 3 (1-4)          | 1 (1-2)          | 0.31 |
| Unfavorable neurological outcome at 6 months , n (%) | 15 (65)          | 9 (75)           | 0.99 |

*IQR: interquartile range; GCS: Glasgow coma scale; SAPS: simplified acute physiology score; NYHA: New York heart association COPD: chronic obstructive pulmonary disease; RRT: renal replacement therapy; ICU: intensive care unit; LOS: length of stay; GOS: Glasgow outcome score; SAH: subarachnoid hemorrhage; TBI: traumatic brain injury; ICH: intracerebral hemorrhage. \*n=25 (n=7 for responders and n=18 for non-responders).*

**Supplemental Table S3** : Comparison of physiological variable before, one and two hours after inotrope administration according to type of response (responder and non-responder groups).

| Variables                  | Responders        |                  |                  | Non-responders   |                  |                  | P value |
|----------------------------|-------------------|------------------|------------------|------------------|------------------|------------------|---------|
|                            | Baseline          | 1h               | 2h               | Baseline         | 1h               | 2h               |         |
| PbtO <sub>2</sub> , mmHg   | 12 (8-16)         | 16 (12-20)       | 19 (14-24)       | 22 (19-28)       | 20 (17-26)       | 20 (18-25)       | 0.001   |
| Hb, g/dL                   | 10.9 (10-12.2)    | 10.5 (9.8-12.4)  | 10.3 (9.9-12.1)  | 11.5 (9.1-12.6)  | 10.4, (9.2-11.9) | 10.2 (9.2-11.8)  | 0.96    |
| MAP, mmHg                  | 109 (88-120)      | 106 (90-121)     | 99 (94-118)      | 122 (117-132)    | 127 (118-133)    | 122 (117-132)    | 0.85    |
| CPP, mmHg                  | 94 (72-104)       | 94 (68-109)      | 87 (75-109)      | 115 (104-118)    | 115 (107-121)    | 113 (103-122)    | 0.74    |
| ICP, mmHg                  | 15 (13-20)        | 15 (11-20)       | 13 (9-17)        | 12 (6-14)        | 9 (8-19)         | 9 (7-17)         | 0.06    |
| HR, bpm                    | 94 (77-108)       | 94 (85-104)      | 106 (86-109)     | 85 (76-100)      | 90 (79-107)      | 103 (90-109)     | 0.71    |
| Temperature, °C            | 36.7, (35.6-37.7) | 36.9 (35.7-38.8) | 36.7 (35-37.8)   | 37.0 (36-37.4)   | 36.9 (35.7-37.2) | 37 (35.9-37.3)   | 0.71    |
| pH                         | 7.41 (7.36-7.43)  | 7.42 (7.33-7.45) | 7.41 (7.37-7.43) | 7.41 (7.37-7.46) | 7.43 (7.39-7.45) | 7.42 (7.37-7.46) | 0.23    |
| PaO <sub>2</sub> , mmHg    | 112 (90-205)      | 96 (75-111)      | 113 (98-126)     | 109 (95-130)     | 112, (101-140)   | 109 (93-138)     | 0.24    |
| PaCO <sub>2</sub> , mmHg   | 39 (35-44)        | 38 (33-44)       | 40 (35-46)       | 44 (41-48)       | 44 (39-46)       | 44 (39-49)       | 0.89    |
| Lactate, mmol/L            | 1.1 (0.9-1.2)     | 1.4 (1-1.9)      | 1.3 (1.1-2.3)    | 1.1 (0.8-1.4)    | 1.1 (0.8-1.6)    | 1.1 (0.7-1.6)    | 0.52    |
| SaO <sub>2</sub> , %       | 99 (97-100)       | 98 (97-99)       | 99 (98-99)       | 99 (98-99)       | 99 (99-99)       | 99 (98-99)       | 0.32    |
| Glucose, mg/dL             | 130 (117-155)     | 184 (133-233)    | 163 (139-285)    | 135 (125-175)    | 143 (113-179)    | 163 (125-190)    | 0.18    |
| SvO <sub>2</sub> , %*      | 78 (73-83)        | 79 (77-80)       | 79 (77-81)       | 80 (79-82)       | 78 (71-81)       | 85 (84-90)       | 0.36    |
| CO, L/min*                 | 5.9 (3.5-7.4)     | 6.4 (5.3-7.6)    | 6.8 (5.8-7.5)    | 6.1 (5.1-8.2)    | 7.2 (6.1-8.4)    | 7.9 (6.8-8.6)    | 0.78    |
| Norepinephrine, mcg/kg*min | 0.35 (0.1-1.8)    | 0.97 (0.18-2.4)  | 0.97 (0.3-2.2)   | 0.43 (0.17-1.2)  | 0.43 (0.14-1.4)  | 0.32 (0.08-1.17) | 0.01    |
| Dobutamine, mcg/kg*min     | 0                 | 3 (2-5)          | 3 (3-5)          | 0                | 5 (3-5)          | 5 (3-5)          | 0.85    |

*PbtO<sub>2</sub>: brain tissue oxygenation partial pressure; Hb: hemoglobin; MAP: mean arterial pressure; CPP: cerebral perfusion pressure mmHg; ICP: intracranial pressure; HR: heart rate; bpm: beats per minute. SaO<sub>2</sub>: Oxygen saturation; PaO<sub>2</sub>: Oxygen partial pressure; PaCO<sub>2</sub>: Carbon dioxide partial pressure. \*n=25 (n=7 for responders and n=18 for non-responders).*

**Supplemental Table S4:** Logistic regression model to identify factors associated with a significant PbtO<sub>2</sub> increase after inotrope administration in SAH patients (n=31)

|                                   | <b>Univariable</b><br><b>OR (95% CI)</b> | <b>Multivariable</b><br><b>OR (95% CI)</b> | <b>P value</b> |
|-----------------------------------|------------------------------------------|--------------------------------------------|----------------|
| Baseline PbtO <sub>2</sub> , mmHg | 0.78 (0.65-0.95)                         | 0.78 (0.64-0.95)                           | 0.02           |
| WFNS 4 or 5, mmHg                 | 0.44 (0.08-2.27)                         | 0.42 (0.04-4.16)                           | 0.46           |
| mFisher 3 or 4, mmHg              | 0.53 (0.03-9.34)                         | 2.87 (0.05-153.46)                         | 0.60           |

*PbtO<sub>2</sub>: brain tissue oxygen partial pressure; WFNS: world federation of neurological surgeons; mFisher: modified Fisher scale*

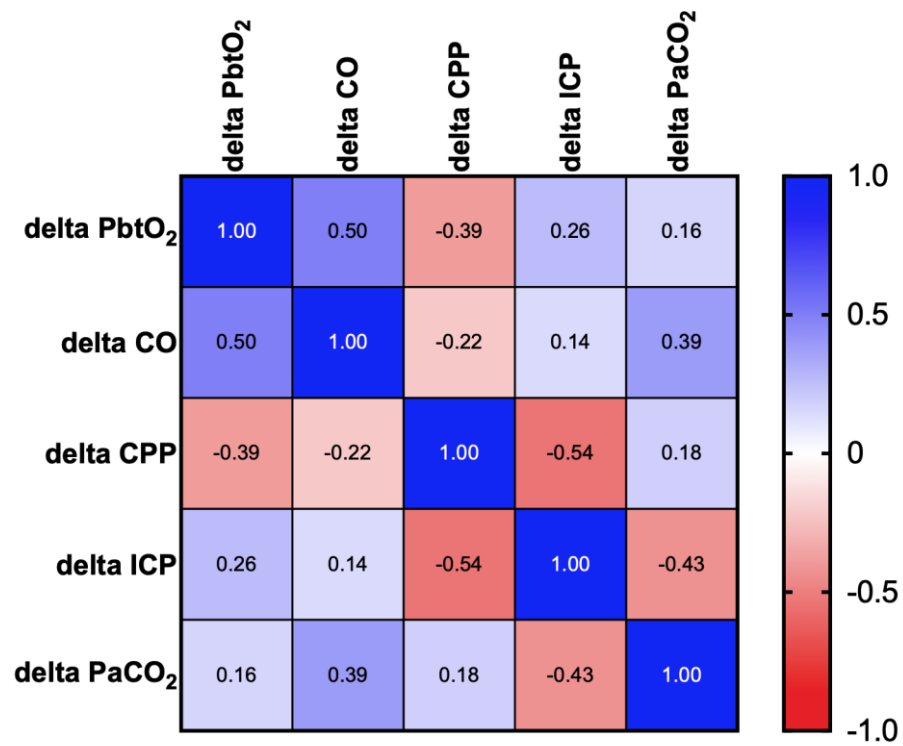

**Supplementary Figure 1.** Correlation matrix of  $\Delta PbtO_2$  and  $\Delta CO$ ,  $\Delta CPP$ ,  $\Delta ICP$  and  $\Delta CPaCO_2$  in the overall study population (CO, n=25).
